# Supplementary material
Source: PubMed Central journal article supplement (PMC5654702)
Supplement: NIHMS875441-supplement-Supplementary_information.pdf [file NIHMS875441-supplement-Supplementary_information.pdf]

**Supplementary Table 1:** Association between genomic and imaging variables (univariate logistic regression analysis)

| Genomic variable          | Imaging variable                   | Odds Ratio  | 95%CI_low | 95%CI_high  | P value |
|---------------------------|------------------------------------|-------------|-----------|-------------|---------|
| Andersen_KRT19 [27]       | Multiple HCCs                      | 2.63        | 0.67      | 10.35       | 0.168   |
| Andersen_KRT19 [27]       | Size ≥ 5cm                         | 5.50        | 1.32      | 22.86       | 0.019   |
| Andersen_KRT19 [27]       | Necrosis                           | 2.78        | 0.73      | 10.63       | 0.136   |
| Andersen_KRT19 [27]       | Wash-in/wash-out                   | 1.65        | 0.35      | 7.69        | 0.526   |
| Andersen_KRT19 [27]       | Hypovascular                       | 0.79        | 0.07      | 9.50        | 0.850   |
| Andersen_KRT19 [27]       | Wash-in/no wash-out                | 0.59        | 0.10      | 3.49        | 0.556   |
| Andersen_KRT19 [27]       | Infiltrative type                  | 9.63        | 1.64      | 56.37       | 0.012   |
| Andersen_KRT19 [27]       | Macrovascular invasion             | 3.50        | 0.69      | 17.64       | 0.129   |
| Andersen_KRT19 [27]       | Mosaic appearance                  | 7.00        | 0.78      | 63.12       | 0.083   |
| Andersen_KRT19 [27]       | Internal arteries                  | 5.77        | 0.63      | 52.63       | 0.121   |
| Andersen_KRT19 [27]       | Capsule                            | 1.03        | 0.28      | 3.77        | 0.959   |
| Andersen_KRT19 [27]       | Extranodular growth                | 2.09        | 0.51      | 8.52        | 0.303   |
| Andersen_KRT19 [27]       | Enhancement ratio AP               | 0.97        | 0.948     | 1           | 0.052   |
| Andersen_KRT19 [27]       | Enhancement ratio PVP              | 0.913       | 0.847     | 0.984       | 0.017   |
| Andersen_KRT19 [27]       | Wash-out ratio                     | 0.996       | 0.976     | 1.016       | 0.688   |
| Andersen_KRT19 [27]       | Tumour-to-liver contrast ratio AP  | 0.008       | 0         | 20.6        | 0.228   |
| Andersen_KRT19 [27]       | Tumour-to-liver contrast ratio PVP | 50520.381   | 0.861     | 2963253997  | 0.053   |
| Boyault_G3 [25]           | Wash-in/no wash-out                | 0.40        | 0.07      | 2.37        | 0.313   |
| Boyault_G3 [25]           | Infiltrative type                  | 6.05        | 1.06      | 34.38       | 0.042   |
| Boyault_G3 [25]           | Macrovascular invasion             | 12.73       | 1.38      | 117.27      | 0.025   |
| Boyault_G3 [25]           | Mosaic appearance                  | 10.46       | 1.16      | 94.48       | 0.037   |
| Boyault_G3 [25]           | Internal arteries                  | 3.20        | 0.56      | 18.39       | 0.192   |
| Boyault_G3 [25]           | Capsule                            | 0.88        | 0.25      | 3.12        | 0.843   |
| Boyault_G3 [25]           | Extranodular growth                | 1.57        | 0.43      | 5.72        | 0.497   |
| Boyault_G3 [25]           | Enhancement ratio AP               | 0.989       | 0.969     | 1.009       | 0.278   |
| Boyault_G3 [25]           | Enhancement ratio PVP              | 0.923       | 0.861     | 0.988       | 0.022   |
| Boyault_G3 [25]           | Wash-out ratio                     | 0.998       | 0.978     | 1.019       | 0.87    |
| Boyault_G3 [25]           | Tumour-to-liver contrast ratio AP  | 0.348       | 0         | 329.925     | 0.763   |
| Boyault_G3 [25]           | Tumour-to-liver contrast ratio PVP | 4934.562    | 0.159     | 153476892.6 | 0.107   |
| Cairo_Hepatoblastoma [47] | Wash-in/no wash-out                | 0.00        | 0.00      | Inf         | 0.994   |
| Cairo_Hepatoblastoma [47] | Infiltrative type                  | 5.20        | 0.97      | 28.02       | 0.055   |
| Cairo_Hepatoblastoma [47] | Macrovascular invasion             | 6.75        | 1.19      | 38.41       | 0.031   |
| Cairo_Hepatoblastoma [47] | Mosaic appearance                  | 42054106.55 | 0.00      | Inf         | 0.994   |
| Cairo_Hepatoblastoma [47] | Internal arteries                  | 40225667.20 | 0.00      | Inf         | 0.994   |
| Cairo_Hepatoblastoma [47] | Capsule                            | 2.31        | 0.47      | 11.42       | 0.305   |
| Cairo_Hepatoblastoma [47] | Extranodular growth                | 1.54        | 0.42      | 5.68        | 0.521   |
| Cairo_Hepatoblastoma [47] | Enhancement ratio AP               | 0.951       | 0.91      | 0.993       | 0.023   |
| Cairo_Hepatoblastoma [47] | Enhancement ratio PVP              | 0.927       | 0.865     | 0.993       | 0.031   |
| Cairo_Hepatoblastoma [47] | Wash-out ratio                     | 0.985       | 0.963     | 1.008       | 0.199   |
| Cairo_Hepatoblastoma [47] | Tumour-to-liver contrast ratio AP  | 0.001       | 0         | 39.183      | 0.198   |
| Cairo_Hepatoblastoma [47] | Tumour-to-liver contrast ratio PVP | 13024.724   | 0.513     | 330736283.4 | 0.067   |
| Chiang_Proliferation [22] | Wash-in/no wash-out                | 0.28        | 0.03      | 2.60        | 0.261   |
| Chiang_Proliferation [22] | Infiltrative type                  | 6.57        | 1.30      | 33.33       | 0.023   |
| Chiang_Proliferation [22] | Macrovascular invasion             | 2.44        | 0.50      | 11.97       | 0.270   |
| Chiang_Proliferation [22] | Mosaic appearance                  | 5.33        | 0.59      | 48.30       | 0.136   |
| Chiang_Proliferation [22] | Internal arteries                  | 4.42        | 0.48      | 40.56       | 0.189   |
| Chiang_Proliferation [22] | Capsule                            | 0.63        | 0.16      | 2.43        | 0.497   |
| Chiang_Proliferation [22] | Extranodular growth                | 1.54        | 0.42      | 5.68        | 0.521   |
| Villanueva_KRT19 [6]      | Multiple HCCs                      | 3.17        | 0.79      | 12.75       | 0.105   |
| Villanueva_KRT19 [6]      | Size ≥ 5cm                         | 4.44        | 1.08      | 18.36       | 0.039   |
| Villanueva_KRT19 [6]      | Necrosis                           | 2.13        | 0.56      | 8.14        | 0.271   |
| Villanueva_KRT19 [6]      | Wash-in/wash-out                   | 2.82        | 0.51      | 15.72       | 0.236   |
| Villanueva_KRT19 [6]      | Hypovascular                       | 0.89        | 0.07      | 10.72       | 0.923   |
| Villanueva_KRT19 [6]      | Wash-in/no wash-out                | 0.24        | 0.03      | 2.27        | 0.215   |
| Villanueva_KRT19 [6]      | Infiltrative type                  | 11.50       | 1.93      | 68.52       | 0.007   |
| Villanueva_KRT19 [6]      | Macrovascular invasion             | 4.07        | 0.80      | 20.75       | 0.091   |
| Villanueva_KRT19 [6]      | Mosaic appearance                  | 6.12        | 0.68      | 55.25       | 0.107   |
| Villanueva_KRT19 [6]      | Internal arteries                  | 5.06        | 0.55      | 46.24       | 0.151   |
| Villanueva_KRT19 [6]      | Capsule                            | 0.81        | 0.22      | 3.03        | 0.757   |
| Villanueva_KRT19 [6]      | Extranodular growth                | 1.77        | 0.47      | 6.62        | 0.399   |
| Villanueva_KRT19 [6]      | Enhancement ratio AP               | 0.978       | 0.953     | 1.003       | 0.088   |
| Villanueva_KRT19 [6]      | Enhancement ratio PVP              | 0.911       | 0.844     | 0.983       | 0.017   |
| Villanueva_KRT19 [6]      | Wash-out ratio                     | 0.996       | 0.976     | 1.017       | 0.696   |
| Villanueva_KRT19 [6]      | Tumour-to-liver contrast ratio AP  | 0.032       | 0         | 67.341      | 0.378   |
| Villanueva_KRT19 [6]      | Tumour-to-liver contrast ratio PVP | 98859.348   | 1.476     | 6620332720  | 0.042   |
| Coulouarn_TGF-beta [28]   | Wash-in/no wash-out                | 0.59        | 0.10      | 3.49        | 0.556   |
| Coulouarn_TGF-beta [28]   | Infiltrative type                  | 9.63        | 1.64      | 56.37       | 0.012   |
| Coulouarn_TGF-beta [28]   | Macrovascular invasion             | 3.50        | 0.69      | 17.64       | 0.129   |

|                               |                                    |             |       |             |       |
|-------------------------------|------------------------------------|-------------|-------|-------------|-------|
| Coulouarn_TGF-beta [28]       | Mosaic appearance                  | 7.00        | 0.78  | 63.12       | 0.083 |
| Coulouarn_TGF-beta [28]       | Internal arteries                  | 5.77        | 0.63  | 52.63       | 0.121 |
| Coulouarn_TGF-beta [28]       | Capsule                            | 1.03        | 0.28  | 3.77        | 0.959 |
| Coulouarn_TGF-beta [28]       | Extranodular growth                | 2.09        | 0.51  | 8.52        | 0.303 |
| Coulouarn_TGF-beta [28]       | Enhancement ratio AP               | 0.976       | 0.952 | 1.001       | 0.062 |
| Coulouarn_TGF-beta [28]       | Enhancement ratio PVP              | 0.904       | 0.834 | 0.98        | 0.014 |
| Coulouarn_TGF-beta [28]       | Wash-out ratio                     | 0.996       | 0.976 | 1.017       | 0.728 |
| Coulouarn_TGF-beta [28]       | Tumour-to-liver contrast ratio AP  | 0.011       | 0     | 22.171      | 0.246 |
| Coulouarn_TGF-beta [28]       | Tumour-to-liver contrast ratio PVP | 125408.668  | 1.153 | 13635520340 | 0.047 |
| Hoshida_S1/S2 [12]            | Wash-in/no wash-out                | 0.96        | 0.19  | 5.03        | 0.966 |
| Hoshida_S1/S2 [12]            | Infiltrative type                  | 7.00        | 1.22  | 40.09       | 0.029 |
| Hoshida_S1/S2 [12]            | Macrovascular invasion             | 1.39        | 0.29  | 6.58        | 0.682 |
| Hoshida_S1/S2 [12]            | Mosaic appearance                  | 3.50        | 0.62  | 19.68       | 0.155 |
| Hoshida_S1/S2 [12]            | Internal arteries                  | 2.81        | 0.49  | 16.16       | 0.246 |
| Hoshida_S1/S2 [12]            | Capsule                            | 0.70        | 0.20  | 2.51        | 0.584 |
| Hoshida_S1/S2 [12]            | Extranodular growth                | 1.34        | 0.38  | 4.67        | 0.648 |
| Hoshida_S1/S2 [12]            | Enhancement ratio AP               | 0.977       | 0.954 | 1.001       | 0.061 |
| Hoshida_S1/S2 [12]            | Enhancement ratio PVP              | 0.973       | 0.932 | 1.016       | 0.21  |
| Hoshida_S1/S2 [12]            | Wash-out ratio                     | 0.988       | 0.967 | 1.01        | 0.291 |
| Hoshida_S1/S2 [12]            | Tumour-to-liver contrast ratio AP  | 0.006       | 0     | 10.399      | 0.177 |
| Hoshida_S1/S2 [12]            | Tumour-to-liver contrast ratio PVP | 2996120.063 | 2.937 | 3.05691E+12 | 0.035 |
| Hoshida_S1 [12]               | Wash-in/no wash-out                | 0.00        | 0.00  | Inf         | 0.994 |
| Hoshida_S1 [12]               | Infiltrative type                  | 4.11        | 0.86  | 19.61       | 0.077 |
| Hoshida_S1 [12]               | Macrovascular invasion             | 2.88        | 0.58  | 14.28       | 0.196 |
| Hoshida_S1 [12]               | Mosaic appearance                  | 1.75        | 0.31  | 10.02       | 0.530 |
| Hoshida_S1 [12]               | Internal arteries                  | 1.43        | 0.24  | 8.38        | 0.693 |
| Hoshida_S1 [12]               | Capsule                            | 0.27        | 0.06  | 1.21        | 0.086 |
| Hoshida_S1 [12]               | Extranodular growth                | 1.12        | 0.23  | 5.40        | 0.889 |
| Hoshida_S1 [12]               | Enhancement ratio AP               | 0.983       | 0.96  | 1.007       | 0.172 |
| Hoshida_S1 [12]               | Enhancement ratio PVP              | 0.931       | 0.872 | 0.993       | 0.03  |
| Hoshida_S1 [12]               | Wash-out ratio                     | 0.998       | 0.977 | 1.019       | 0.821 |
| Hoshida_S1 [12]               | Tumour-to-liver contrast ratio AP  | 0.049       | 0     | 111.726     | 0.444 |
| Hoshida_S1 [12]               | Tumour-to-liver contrast ratio PVP | 2124.397    | 0.139 | 32381231.93 | 0.119 |
| Hoshida_S2 [12]               | Wash-in/no wash-out                | 11.25       | 1.42  | 89.26       | 0.022 |
| Hoshida_S2 [12]               | Infiltrative type                  | 2.57        | 0.36  | 18.49       | 0.348 |
| Hoshida_S2 [12]               | Macrovascular invasion             | 0.00        | 0.00  | Inf         | 0.994 |
| Hoshida_S2 [12]               | Mosaic appearance                  | 23129758.62 | 0.00  | Inf         | 0.994 |
| Hoshida_S2 [12]               | Internal arteries                  | 22240152.46 | 0.00  | Inf         | 0.994 |
| Hoshida_S2 [12]               | Capsule                            | 5.71        | 0.58  | 56.72       | 0.137 |
| Hoshida_S2 [12]               | Extranodular growth                | 1.34        | 0.34  | 5.28        | 0.680 |
| Hoshida_S2 [12]               | Enhancement ratio AP               | 0.983       | 0.95  | 1.017       | 0.327 |
| Hoshida_S2 [12]               | Enhancement ratio PVP              | 1.028       | 0.982 | 1.076       | 0.242 |
| Hoshida_S2 [12]               | Wash-out ratio                     | 0.985       | 0.961 | 1.01        | 0.23  |
| Hoshida_S2 [12]               | Tumour-to-liver contrast ratio AP  | 0.002       | 0     | 691.326     | 0.344 |
| Hoshida_S2 [12]               | Tumour-to-liver contrast ratio PVP | 843.366     | 0.018 | 38922074.41 | 0.219 |
| Lee_Poor survival [49]        | Wash-in/no wash-out                | 0.59        | 0.10  | 3.49        | 0.556 |
| Lee_Poor survival [49]        | Infiltrative type                  | 4.67        | 0.95  | 22.90       | 0.058 |
| Lee_Poor survival [49]        | Macrovascular invasion             | 1.82        | 0.38  | 8.73        | 0.455 |
| Lee_Poor survival [49]        | Mosaic appearance                  | 7.00        | 0.78  | 63.12       | 0.083 |
| Lee_Poor survival [49]        | Internal arteries                  | 5.77        | 0.63  | 52.63       | 0.121 |
| Lee_Poor survival [49]        | Capsule                            | 0.67        | 0.18  | 2.46        | 0.543 |
| Lee_Poor survival [49]        | Extranodular growth                | 1.77        | 0.47  | 6.62        | 0.399 |
| Lee_Poor survival [49]        | Enhancement ratio AP               | 0.976       | 0.951 | 1.001       | 0.062 |
| Lee_Poor survival [49]        | Enhancement ratio PVP              | 0.932       | 0.875 | 0.993       | 0.03  |
| Lee_Poor survival [49]        | Wash-out ratio                     | 0.996       | 0.976 | 1.017       | 0.706 |
| Lee_Poor survival [49]        | Tumour-to-liver contrast ratio AP  | 0.014       | 0     | 31.131      | 0.279 |
| Lee_Poor survival [49]        | Tumour-to-liver contrast ratio PVP | 3096.142    | 0.156 | 61372405.11 | 0.111 |
| Novak_Met [50]                | Wash-in/no wash-out                | 0.00        | 0.00  | Inf         | 0.994 |
| Novak_Met [50]                | Infiltrative type                  | 4.00        | 0.79  | 20.38       | 0.095 |
| Novak_Met [50]                | Macrovascular invasion             | 5.20        | 0.97  | 28.02       | 0.055 |
| Novak_Met [50]                | Mosaic appearance                  | 49563768.37 | 0.00  | Inf         | 0.993 |
| Novak_Met [50]                | Internal arteries                  | 2.44        | 0.26  | 22.97       | 0.437 |
| Novak_Met [50]                | Capsule                            | 0.50        | 0.11  | 2.38        | 0.384 |
| Novak_Met [50]                | Extranodular growth                | 1.98        | 0.46  | 8.52        | 0.357 |
| Novak_Met [50]                | Enhancement ratio AP               | 0.989       | 0.965 | 1.014       | 0.385 |
| Novak_Met [50]                | Enhancement ratio PVP              | 0.936       | 0.878 | 0.998       | 0.043 |
| Novak_Met [50]                | Wash-out ratio                     | 1.012       | 0.984 | 1.041       | 0.408 |
| Novak_Met [50]                | Tumour-to-liver contrast ratio AP  | 0.015       | 0     | 123.874     | 0.363 |
| Novak_Met [50]                | Tumour-to-liver contrast ratio PVP | 2426.996    | 0.148 | 39832599.32 | 0.115 |
| Minguez_Vascular invasion [9] | Wash-in/no wash-out                | 0.45        | 0.08  | 2.69        | 0.384 |

|                                  |                                    |             |       |             |       |
|----------------------------------|------------------------------------|-------------|-------|-------------|-------|
| Minguez_Vascular invasion [9]    | Infiltrative type                  | 7.00        | 1.22  | 40.09       | 0.029 |
| Minguez_Vascular invasion [9]    | Macrovascular invasion             | 2.64        | 0.53  | 13.12       | 0.236 |
| Minguez_Vascular invasion [9]    | Mosaic appearance                  | 3.50        | 0.62  | 19.68       | 0.155 |
| Minguez_Vascular invasion [9]    | Internal arteries                  | 2.81        | 0.49  | 16.16       | 0.246 |
| Minguez_Vascular invasion [9]    | Capsule                            | 0.70        | 0.20  | 2.51        | 0.584 |
| Minguez_Vascular invasion [9]    | Extranodular growth                | 1.34        | 0.38  | 4.67        | 0.648 |
| Minguez_Vascular invasion [9]    | Enhancement ratio AP               | 0.988       | 0.967 | 1.008       | 0.234 |
| Minguez_Vascular invasion [9]    | Enhancement ratio PVP              | 0.942       | 0.889 | 0.999       | 0.045 |
| Minguez_Vascular invasion [9]    | Wash-out ratio                     | 0.993       | 0.973 | 1.014       | 0.508 |
| Minguez_Vascular invasion [9]    | Tumour-to-liver contrast ratio AP  | 0.194       | 0     | 195.874     | 0.642 |
| Minguez_Vascular invasion [9]    | Tumour-to-liver contrast ratio PVP | 581.931     | 0.04  | 8552864.618 | 0.193 |
| Woo_Cholangiocarcinoma_like [26] | Wash-in/no wash-out                | 0.45        | 0.08  | 2.69        | 0.384 |
| Woo_Cholangiocarcinoma_like [26] | Infiltrative type                  | 7.00        | 1.22  | 40.09       | 0.029 |
| Woo_Cholangiocarcinoma_like [26] | Macrovascular invasion             | 1.39        | 0.29  | 6.58        | 0.682 |
| Woo_Cholangiocarcinoma_like [26] | Mosaic appearance                  | 1.75        | 0.37  | 8.33        | 0.482 |
| Woo_Cholangiocarcinoma_like [26] | Internal arteries                  | 2.81        | 0.49  | 16.16       | 0.246 |
| Woo_Cholangiocarcinoma_like [26] | Capsule                            | 0.46        | 0.12  | 1.67        | 0.235 |
| Woo_Cholangiocarcinoma_like [26] | Extranodular growth                | 1.77        | 0.47  | 6.62        | 0.399 |
| Woo_Cholangiocarcinoma_like [26] | Enhancement ratio AP               | 0.972       | 0.946 | 0.998       | 0.037 |
| Woo_Cholangiocarcinoma_like [26] | Enhancement ratio PVP              | 0.919       | 0.855 | 0.986       | 0.019 |
| Woo_Cholangiocarcinoma_like [26] | Wash-out ratio                     | 0.997       | 0.977 | 1.017       | 0.742 |
| Woo_Cholangiocarcinoma_like [26] | Tumour-to-liver contrast ratio AP  | 0.001       | 0     | 4.15        | 0.106 |
| Woo_Cholangiocarcinoma_like [26] | Tumour-to-liver contrast ratio PVP | 9408.632    | 0.232 | 381304326.4 | 0.091 |
| Woo_recurrence [51]              | Wash-in/no wash-out                | 0.28        | 0.03  | 2.60        | 0.261 |
| Woo_recurrence [51]              | Infiltrative type                  | 3.44        | 0.73  | 16.10       | 0.117 |
| Woo_recurrence [51]              | Macrovascular invasion             | 2.44        | 0.50  | 11.97       | 0.270 |
| Woo_recurrence [51]              | Mosaic appearance                  | 1.00        | 0.21  | 4.86        | 1.000 |
| Woo_recurrence [51]              | Internal arteries                  | 1.65        | 0.28  | 9.60        | 0.577 |
| Woo_recurrence [51]              | Capsule                            | 0.38        | 0.09  | 1.56        | 0.179 |
| Woo_recurrence [51]              | Extranodular growth                | 1.34        | 0.34  | 5.28        | 0.680 |
| Woo_recurrence [51]              | Enhancement ratio AP               | 0.98        | 0.956 | 1.005       | 0.121 |
| Woo_recurrence [51]              | Enhancement ratio PVP              | 0.891       | 0.814 | 0.975       | 0.012 |
| Woo_recurrence [51]              | Wash-out ratio                     | 0.998       | 0.977 | 1.019       | 0.857 |
| Woo_recurrence [51]              | Tumour-to-liver contrast ratio AP  | 0.127       | 0     | 232.799     | 0.59  |
| Woo_recurrence [51]              | Tumour-to-liver contrast ratio PVP | 696046.308  | 4.91  | 98670478316 | 0.026 |
| Yamashita_EpCAM [48]             | Wash-in/no wash-out                | 0.88        | 0.15  | 5.34        | 0.889 |
| Yamashita_EpCAM [48]             | Infiltrative type                  | 2.20        | 0.47  | 10.30       | 0.317 |
| Yamashita_EpCAM [48]             | Macrovascular invasion             | 2.88        | 0.58  | 14.28       | 0.196 |
| Yamashita_EpCAM [48]             | Mosaic appearance                  | 77099195.25 | 0.00  | Inf         | 0.993 |
| Yamashita_EpCAM [48]             | Internal arteries                  | 3.85        | 0.42  | 35.47       | 0.234 |
| Yamashita_EpCAM [48]             | Capsule                            | 1.25        | 0.32  | 4.88        | 0.748 |
| Yamashita_EpCAM [48]             | Extranodular growth                | 1.15        | 0.32  | 4.11        | 0.826 |
| Yamashita_EpCAM [48]             | Enhancement ratio AP               | 0.968       | 0.939 | 0.999       | 0.046 |
| Yamashita_EpCAM [48]             | Enhancement ratio PVP              | 0.999       | 0.961 | 1.038       | 0.966 |
| Yamashita_EpCAM [48]             | Wash-out ratio                     | 0.976       | 0.952 | 1.001       | 0.056 |
| Yamashita_EpCAM [48]             | Tumour-to-liver contrast ratio AP  | 0.006       | 0     | 33.768      | 0.245 |
| Yamashita_EpCAM [48]             | Tumour-to-liver contrast ratio PVP | 1174.133    | 0.09  | 15352383.59 | 0.144 |

AP: arterial phase, PVP: portal venous phase, Inf: infinite

**Supplementary Table 2:** Association between genomic and pathology variables (univariate logistic regression analysis)

| Genomic variable                 | Pathology variable     | Odds Ratio   | 95%CI_low | 95%CI_high | P value |
|----------------------------------|------------------------|--------------|-----------|------------|---------|
| Andersen_KRT19 [27]              | Poorly differentiated  | 9.90         | 2.18      | 44.98      | 0.003   |
| Andersen_KRT19 [27]              | Microvascular invasion | 115648793.00 | 0.00      | Inf        | 0.994   |
| Andersen_KRT19 [27]              | Size ≥ 5cm             | 8.25         | 1.90      | 35.91      | 0.005   |
| Andersen_KRT19 [27]              | Fibrosis stage 4       | 0.46         | 0.11      | 1.83       | 0.269   |
| Boyault_G3 [25]                  | Poorly differentiated  | 4.71         | 1.18      | 18.86      | 0.028   |
| Boyault_G3 [25]                  | Microvascular invasion | 9.15         | 1.00      | 83.97      | 0.050   |
| Boyault_G3 [25]                  | Size ≥ 5cm             | 3.93         | 1.03      | 15.00      | 0.045   |
| Boyault_G3 [25]                  | Fibrosis stage 4       | 0.54         | 0.14      | 2.06       | 0.366   |
| Cairo_Hepatoblastoma [47]        | Poorly differentiated  | 16.33        | 1.75      | 152.80     | 0.014   |
| Cairo_Hepatoblastoma [47]        | Microvascular invasion | 42054106.54  | 0.00      | Inf        | 0.994   |
| Cairo_Hepatoblastoma [47]        | Size ≥ 5cm             | 5.46         | 0.94      | 31.75      | 0.059   |
| Cairo_Hepatoblastoma [47]        | Fibrosis stage 4       | 0.46         | 0.09      | 2.45       | 0.361   |
| Chiang_Proliferation [22]        | Poorly differentiated  | 10.56        | 2.17      | 51.42      | 0.004   |
| Chiang_Proliferation [22]        | Microvascular invasion | 88437312.29  | 0.00      | Inf        | 0.994   |
| Chiang_Proliferation [22]        | Size ≥ 5cm             | 5.06         | 1.20      | 21.42      | 0.028   |
| Chiang_Proliferation [22]        | Fibrosis stage 4       | 0.47         | 0.11      | 1.98       | 0.303   |
| Villanueva_KRT19 [6]             | Poorly differentiated  | 13.93        | 2.78      | 69.88      | 0.001   |
| Villanueva_KRT19 [6]             | Microvascular invasion | 101192693.90 | 0.00      | Inf        | 0.994   |
| Villanueva_KRT19 [6]             | Size ≥ 5cm             | 6.43         | 1.51      | 27.45      | 0.012   |
| Villanueva_KRT19 [6]             | Fibrosis stage 4       | 0.36         | 0.09      | 1.49       | 0.157   |
| Coulouarn_TGF-beta [28]          | Poorly differentiated  | 9.90         | 2.18      | 44.98      | 0.003   |
| Coulouarn_TGF-beta [28]          | Microvascular invasion | 2.29         | 0.40      | 13.28      | 0.354   |
| Coulouarn_TGF-beta [28]          | Size ≥ 5cm             | 8.25         | 1.90      | 35.91      | 0.005   |
| Coulouarn_TGF-beta [28]          | Fibrosis stage 4       | 0.46         | 0.11      | 1.83       | 0.269   |
| Hoshida_S1/S2 [12]               | Poorly differentiated  | 10.20        | 2.26      | 46.09      | 0.003   |
| Hoshida_S1/S2 [12]               | Microvascular invasion | 3.00         | 0.52      | 17.32      | 0.219   |
| Hoshida_S1/S2 [12]               | Size ≥ 5cm             | 3.06         | 0.82      | 11.44      | 0.096   |
| Hoshida_S1/S2 [12]               | Fibrosis stage 4       | 0.70         | 0.18      | 2.70       | 0.608   |
| Hoshida_S1 [12]                  | Poorly differentiated  | 4.50         | 1.04      | 19.39      | 0.044   |
| Hoshida_S1 [12]                  | Microvascular invasion | 1.50         | 0.26      | 8.82       | 0.654   |
| Hoshida_S1 [12]                  | Size ≥ 5cm             | 1.46         | 0.37      | 5.71       | 0.591   |
| Hoshida_S1 [12]                  | Fibrosis stage 4       | 1.00         | 0.25      | 4.08       | 1.000   |
| Hoshida_S2 [12]                  | Poorly differentiated  | 7.00         | 0.70      | 70.04      | 0.098   |
| Hoshida_S2 [12]                  | Microvascular invasion | 23129758.60  | 0.00      | Inf        | 0.994   |
| Hoshida_S2 [12]                  | Size ≥ 5cm             | 6.46         | 0.65      | 64.30      | 0.111   |
| Hoshida_S2 [12]                  | Fibrosis stage 4       | 0.33         | 0.03      | 3.96       | 0.378   |
| Lee_Poor survival [49]           | Poorly differentiated  | 5.67         | 1.37      | 23.46      | 0.017   |
| Lee_Poor survival [49]           | Microvascular invasion | 6.13         | 0.67      | 56.10      | 0.109   |
| Lee_Poor survival [49]           | Size ≥ 5cm             | 4.86         | 1.21      | 19.47      | 0.026   |
| Lee_Poor survival [49]           | Fibrosis stage 4       | 0.46         | 0.11      | 1.83       | 0.269   |
| Novak_Met [50]                   | Poorly differentiated  | 21.00        | 2.25      | 195.79     | 0.008   |
| Novak_Met [50]                   | Microvascular invasion | 49563768.43  | 0.00      | Inf        | 0.994   |
| Novak_Met [50]                   | Size ≥ 5cm             | 3.46         | 0.72      | 16.64      | 0.122   |
| Novak_Met [50]                   | Fibrosis stage 4       | 1.25         | 0.25      | 6.29       | 0.787   |
| Minguez_Vascular invasion [9]    | Poorly differentiated  | 5.87         | 1.43      | 24.11      | 0.014   |
| Minguez_Vascular invasion [9]    | Microvascular invasion | 8.00         | 0.87      | 73.27      | 0.066   |
| Minguez_Vascular invasion [9]    | Size ≥ 5cm             | 3.06         | 0.82      | 11.44      | 0.096   |
| Minguez_Vascular invasion [9]    | Fibrosis stage 4       | 1.13         | 0.29      | 4.33       | 0.864   |
| Woo_Cholangiocarcinoma_like [26] | Poorly differentiated  | 5.87         | 1.43      | 24.11      | 0.014   |
| Woo_Cholangiocarcinoma_like [26] | Microvascular invasion | 3.00         | 0.52      | 17.32      | 0.219   |
| Woo_Cholangiocarcinoma_like [26] | Size ≥ 5cm             | 3.06         | 0.82      | 11.44      | 0.096   |
| Woo_Cholangiocarcinoma_like [26] | Fibrosis stage 4       | 0.70         | 0.18      | 2.70       | 0.608   |
| Woo_recurrence [51]              | Poorly differentiated  | 3.40         | 0.84      | 13.76      | 0.086   |
| Woo_recurrence [51]              | Microvascular invasion | 1.74         | 0.30      | 10.14      | 0.540   |
| Woo_recurrence [51]              | Size ≥ 5cm             | 1.87         | 0.49      | 7.18       | 0.364   |
| Woo_recurrence [51]              | Fibrosis stage 4       | 0.46         | 0.11      | 1.83       | 0.269   |
| Yamashita_EpCAM [48]             | Poorly differentiated  | 4.50         | 1.04      | 19.39      | 0.044   |
| Yamashita_EpCAM [48]             | Microvascular invasion | 4.05         | 0.44      | 37.43      | 0.217   |
| Yamashita_EpCAM [48]             | Size ≥ 5cm             | 2.38         | 0.59      | 9.54       | 0.221   |
| Yamashita_EpCAM [48]             | Fibrosis stage 4       | 0.63         | 0.14      | 2.72       | 0.531   |

**Supplementary Table 3:** Association between genomic variable and staging (univariate logistic regression analysis)

| Genomic variable                 | Staging              | Odds Ratio | 95%CI_low | 95%CI_high | P value |
|----------------------------------|----------------------|------------|-----------|------------|---------|
| Andersen_KRT19 [27]              | BCLC (0/A vs. B/C/D) | 4.11       | 1         | 16.99      | 0.051   |
| Andersen_KRT19 [27]              | AJCC (T1/2 vs. T3/4) | 6.75       | 1.51      | 30.16      | 0.012   |
| Boyault_G3 [25]                  | BCLC (0/A vs. B/C/D) | 7.08       | 1.52      | 33.03      | 0.013   |
| Boyault_G3 [25]                  | AJCC (T1/2 vs. T3/4) | 13.36      | 2.33      | 76.48      | 0.004   |
| Cairo_Hepatoblastoma [47]        | BCLC (0/A vs. B/C/D) | 4.58       | 0.89      | 23.73      | 0.07    |
| Cairo_Hepatoblastoma [47]        | AJCC (T1/2 vs. T3/4) | 4.38       | 0.84      | 22.71      | 0.079   |
| Chiang_Proliferation [22]        | BCLC (0/A vs. B/C/D) | 3.69       | 0.89      | 15.37      | 0.072   |
| Chiang_Proliferation [22]        | AJCC (T1/2 vs. T3/4) | 3.5        | 0.84      | 14.61      | 0.086   |
| Villanueva_KRT19 [6]             | BCLC (0/A vs. B/C/D) | 5.07       | 1.19      | 21.51      | 0.028   |
| Villanueva_KRT19 [6]             | AJCC (T1/2 vs. T3/4) | 4.8        | 1.13      | 20.46      | 0.034   |
| Coulouarn_TGF-beta [28]          | BCLC (0/A vs. B/C/D) | 4.11       | 1         | 16.99      | 0.051   |
| Coulouarn_TGF-beta [28]          | AJCC (T1/2 vs. T3/4) | 6.75       | 1.51      | 30.16      | 0.012   |
| Hoshida_S1/S2 [12]               | BCLC (0/A vs. B/C/D) | 1.75       | 0.45      | 6.77       | 0.417   |
| Hoshida_S1/S2 [12]               | AJCC (T1/2 vs. T3/4) | 2.67       | 0.66      | 10.7       | 0.167   |
| Hoshida_S1 [12]                  | BCLC (0/A vs. B/C/D) | 1.61       | 0.39      | 6.64       | 0.512   |
| Hoshida_S1 [12]                  | AJCC (T1/2 vs. T3/4) | 1.52       | 0.37      | 6.3        | 0.565   |
| Hoshida_S2 [12]                  | BCLC (0/A vs. B/C/D) | 1.33       | 0.19      | 9.19       | 0.77    |
| Hoshida_S2 [12]                  | AJCC (T1/2 vs. T3/4) | 3.3        | 0.48      | 22.94      | 0.228   |
| Lee_Poor survival [49]           | BCLC (0/A vs. B/C/D) | 2.48       | 0.63      | 9.82       | 0.196   |
| Lee_Poor survival [49]           | AJCC (T1/2 vs. T3/4) | 3.89       | 0.94      | 16.12      | 0.061   |
| Novak_Met [50]                   | BCLC (0/A vs. B/C/D) | 6.29       | 1.24      | 31.96      | 0.027   |
| Novak_Met [50]                   | AJCC (T1/2 vs. T3/4) | 6          | 1.18      | 30.58      | 0.031   |
| Minguez_Vascular invasion [9]    | BCLC (0/A vs. B/C/D) | 2.84       | 0.71      | 11.35      | 0.139   |
| Minguez_Vascular invasion [9]    | AJCC (T1/2 vs. T3/4) | 4.5        | 1.05      | 19.22      | 0.042   |
| Woo_Cholangiocarcinoma_like [26] | BCLC (0/A vs. B/C/D) | 1.75       | 0.45      | 6.77       | 0.417   |
| Woo_Cholangiocarcinoma_like [26] | AJCC (T1/2 vs. T3/4) | 2.67       | 0.66      | 10.7       | 0.167   |
| Woo_recurrence [51]              | BCLC (0/A vs. B/C/D) | 2.2        | 0.55      | 8.91       | 0.267   |
| Woo_recurrence [51]              | AJCC (T1/2 vs. T3/4) | 2.08       | 0.51      | 8.45       | 0.305   |
| Yamashita_EpCAM [48]             | BCLC (0/A vs. B/C/D) | 1.61       | 0.39      | 6.64       | 0.512   |
| Yamashita_EpCAM [48]             | AJCC (T1/2 vs. T3/4) | 2.57       | 0.62      | 10.74      | 0.195   |

AJCC: American Joint Committee on Cancer; BCLC: Barcelona Clinic Liver Cancer
